# Supplementary material
Source: publisher figshare collection journal article supplement (https://acs.figshare.com/ndownloader/files/3826543)
Supplement: Supplementary file 1 [file 3826543]

## Supporting Information

# Phosphorus Concentration Dependent Microstructure and Optical Property of ZnO Nanowires Grown by High-pressure Pulsed Laser Deposition

*Zhiwen Qiu<sup>†</sup>, Haibo Gong<sup>†</sup>, Xiaopeng Yang<sup>†</sup>, Zichao Zhang<sup>†</sup>, Jun Han<sup>†</sup>, Bingqiang*

*Cao<sup>†,‡,\*</sup>, Daisuke Nakamura,<sup>‡</sup> and Tatsuo Okada<sup>‡</sup>,*

Key Lab of Inorganic Functional Material in Universities of Shandong, School of  
Material Science and Engineering, University of Jinan, Jinan 250022, China;  
Graduate School of Information Science and Electrical Engineering, Kyushu  
University, Fukuoka 819-0395, Japan

---

\* To whom correspondence should be addressed.

E-mail: mse\_caobq@ujn.edu.cn

<sup>†</sup> University of Jinan

<sup>‡</sup> Kyushu University

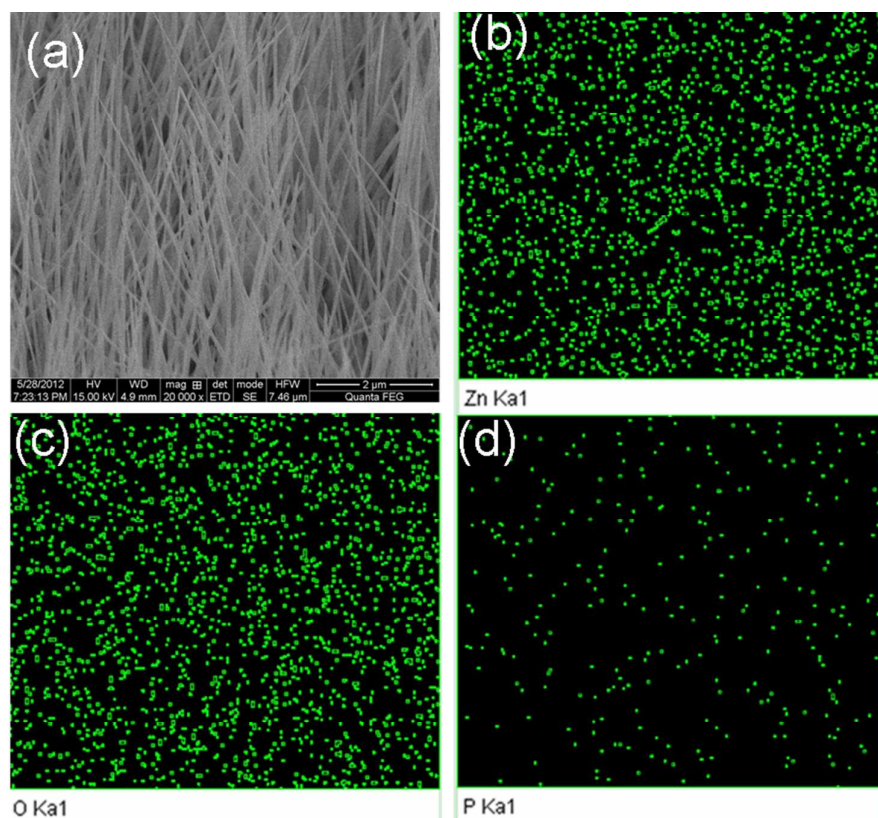

**Figure S.** (a) SEM image showing the general morphology of P-doped ZnO nanowires (2 wt%), (b-d) elemental maps of Zn, O and P obtained by EDS.

To gain an insight into the existence and distribution of phosphorus element, EDX mappings were measured on a small-area ZnO:P nanowires, as shown in Figure S(a). The corresponding Zn and O elemental mappings were shown in Figure S(b, c), respectively. The brighter points represent a higher concentration of element. The phosphorus intensity of the ZnO:P nanowires in Figure S(d) was almost homogeneous, confirming the incorporation of phosphorus into the nanowires.

(1) Meyer, B. K.; Alves, H.; Hofmann, D. M.; Kriegseis, W.; Forster, D.; Bertram, F. Christen, J.; Hoffmann, A.; Dworzak, M.; Haboeck, U.; Rodina, A. V. Bound exciton and donor–acceptor pair recombinations in ZnO. *Phys. Status Solidi* **2004**, *241*, 231-260.

(2) Brandt, M.; Wenckstern, H V.; Schmidt, H. Rahm, A.; Biehne, G.; Benndorf, G.;

Hochmuth, H.; Lorenz, M.; Meinecke, C.; Butz, T.; Grundmann, M. High Electron Mobility of Phosphorous-Doped Homoepitaxial ZnO Thin Films Grown by Pulsed-Laser Deposition. *J. Appl. Phys.* **2008**, *104*, 013708-013713.
